# Supplementary material for: Molecular phenotypes of mitochondrial dysfunction in clinically non-manifesting heterozygous PRKN variant carriers
Source: PubMed Central journal article supplement (PMC10113363; doi:10.1038/s41531-023-00499-9), 2023-04-18
Supplement: 41531_2023_499_MOESM1_ESM.pdf [file 41531_2023_499_MOESM1_ESM.pdf]

## SUPPLEMENTARY INFORMATION

**Supplementary Table 1.** Individuals, for which LCLs and hiPSC-derived neurons were generated

| ID                      | PRKN mutation                                               | PD status  | LCLs | hiPSC-derived neurons | SN hyperechogenicity | Subtle motor signs (UPDRS-III) | Hypomimia |
|-------------------------|-------------------------------------------------------------|------------|------|-----------------------|----------------------|--------------------------------|-----------|
| PRKN+/PD- 1             | heterozygous exon 7 deletion                                | unaffected | √    | √                     | yes                  | yes                            | +         |
| PRKN+/PD- 2             | heterozygous exon 7 deletion                                | unaffected | √    | √                     | yes                  | yes                            | +         |
| PRKN+/PD- 3             | heterozygous exon 7 deletion                                | unaffected | √    |                       | no                   | no                             |           |
| PRKN+/PD- 4             | heterozygous exon 7 deletion                                | unaffected | √    |                       | no                   | yes                            | +         |
| PRKN+/PD- 5             | heterozygous exon 7 deletion                                | unaffected | √    |                       | yes                  | no                             |           |
| PRKN+/PD- 6             | heterozygous exon 7 deletion                                | unaffected | √    |                       | no                   | no                             |           |
| PRKN+/PD- 7             | heterozygous exon 7 deletion                                | unaffected | √    |                       | no                   | no                             |           |
| PRKN+/PD- 8             | heterozygous exon 7 deletion                                | unaffected | √    |                       | yes                  | no                             |           |
| PRKN+/PD- 9             | heterozygous exon 7 deletion                                | unaffected | √    |                       | yes                  | no                             |           |
| PRKN+/PD- 10            | heterozygous exon 7 deletion                                | unaffected | √    |                       | yes                  | no                             |           |
| PRKN+/PD- 11            | heterozygous exon 7 deletion                                | unaffected | √    |                       | yes                  | yes                            | +         |
| Control 1 <sup>1</sup>  | /                                                           | /          | /    | √                     | n.a.                 | n.a.                           | n.a.      |
| Control 2               | /                                                           | /          | √    | √                     | no                   | no                             |           |
| Control 3               | /                                                           | /          |      | √                     | yes                  | no                             |           |
| Control 4               | /                                                           | /          | √    |                       | no                   | no                             |           |
| Control 5               | /                                                           | /          | √    |                       | yes                  | no                             |           |
| Control 6               | /                                                           | /          | √    |                       | no                   | no                             |           |
| Control 7               | /                                                           | /          | √    |                       | yes                  | yes                            | +         |
| Control 8               | /                                                           | /          | √    |                       | no                   | no                             |           |
| Control 9               | /                                                           | /          | √    |                       | yes                  | yes                            | +         |
| Control 10              | /                                                           | /          | √    |                       | no                   | no                             |           |
| Control 11              | /                                                           | /          | √    |                       | yes                  | no                             |           |
| PRKN+/PD+1 <sup>2</sup> | exon 9 homozygous delA (p.Val324AlafsTer111 - rs1562519380) | Affected   |      | √                     | n.a.                 | n.a.                           | n.a.      |
| PRKN+/PD+2 <sup>2</sup> | homozygous exon 3 deletion                                  | Affected   |      | √                     | n.a.                 | n.a.                           | n.a.      |

In the age range of 30-54 years at examination, there are 7 males, 6 females, and 7 mutation carriers; in the age range of 55-80 years at examination, there are 5 males, 4 females, and 6 mutation carriers

SN: *substantia nigra*; UPDRS-III: Unified Parkinson's Disease Rating Scale (UPDRS)-Part III; n.a.: not available

SN hyperechogenicity, subtle motor signs, and hypomimia are regarded as markers for prodromal PD<sup>1,2</sup>

<sup>1</sup> healthy control line established through the StemBANCC consortium (<https://cells.ebisc.org/STBCi033-B/>)

<sup>2</sup> biallelic PRKN-PD lines included in the analyses for comparison<sup>3,4</sup>

**Supplementary Table 2.** Respiratory parameters assessed in LCLs of heterozygous *PRKN* variant carriers (n=11) and controls (n=9)

| <i>Respiratory parameters</i>     | <i>controls<br/>(n = 11)</i> |               | <i>PRKN+/PD-<br/>(n = 9)</i> |               | <i>p-value</i> |
|-----------------------------------|------------------------------|---------------|------------------------------|---------------|----------------|
|                                   | <i>mean</i>                  | <i>median</i> | <i>mean</i>                  | <i>median</i> |                |
| Routine respiration (R)           | 2.87±0.40                    | 2.87          | 3.19±0.28                    | 3.05          | <b>0.023</b>   |
| Leak respiration (L)              | 0.88±0.13                    | 0.90          | 0.95±0.16                    | 0.98          | 0.382          |
| Maximal respiratory capacity (E)  | 6.58±1.20                    | 6.69          | 7.08±0.99                    | 6.70          | 0.518          |
| Residual Oxygen Consumption (ROX) |                              |               |                              |               |                |
| Rotenone                          | 0.18±0.04                    | 0.17          | 0.20±0.03                    | 0.20          | 0.305          |
| Antimycin A                       | 0.22±0.03                    | 0.22          | 0.24±0.03                    | 0.24          | 0.138          |
| ATP Turnover (R-L)                | 1.99±0.39                    | 1.93          | 2.25±0.30                    | 2.17          | 0.159          |
| Spare Respiratory Capacity (ET-R) | 3.71±0.82                    | 3.71          | 3.89±0.74                    | 3.51          | 0.909          |

Values are given as mean ± s.d. and median. Statistical analysis was carried out by using the Mann-Whitney U test. Bold p-value indicates significance with an alpha level of 0.05.

a

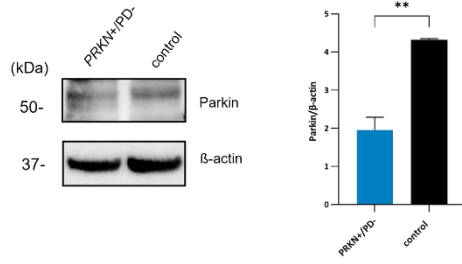

b

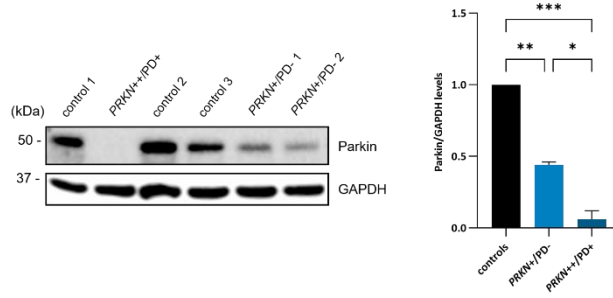

c

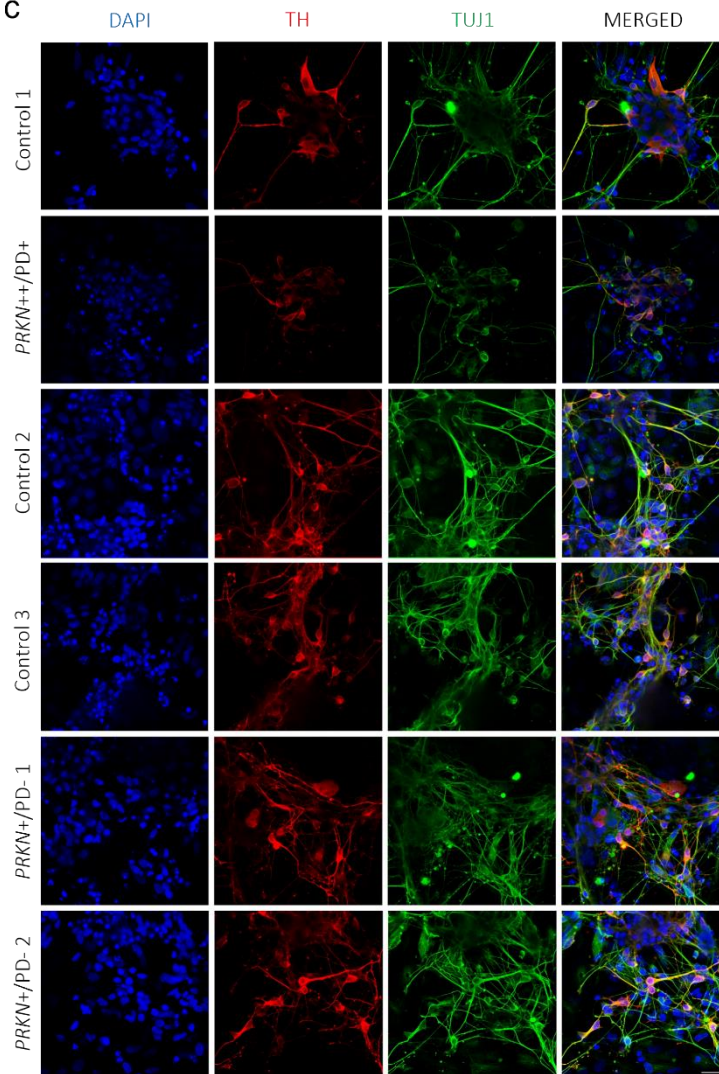

**Supplementary Figure 1. Characterization of LCLs and hiPSC-derived neurons. (a)** Western blot and densitometric analyses showing Parkin protein expression in LCLs of a control and a heterozygous *PRKN* variant carrier (*PRKN*+/*PD*-), *n* = 3. **(b)** Western blot and densitometric analyses showing Parkin protein expression in hiPSC-derived neurons of a PD line (*PRKN*+/*PD*+), controls, and heterozygous *PRKN* variant carriers (*PRKN*+/*PD*- 1, *PRKN*+/*PD*- 2), *n* = 2. Parkin levels were analyzed with an anti-Parkin antibody recognizing the C-terminus, GAPDH and  $\beta$ -actin were used as loading control. Molecular mass markers are in kilodaltons (kDa). Error bar represents the mean  $\pm$  SEM. Significance levels were determined by using an Unpaired t test when comparing two groups, as well as one-way ANOVA and Tukey's *post hoc* test to correct for multiple comparisons. \*  $p \leq 0.05$ , \*\*  $p \leq 0.01$ , \*\*\*  $p \leq 0.001$ . **(c)** Immunofluorescence staining of neuronal cultures derived from a PD line (*PRKN*+/*PD*+), controls, and heterozygous variant carriers (*PRKN*+/*PD*- 1, *PRKN*+/*PD*- 2), for neuron-specific TUJ1 (green), the DA marker TH (red), and nuclear DAPI (blue). Scale bar: 25  $\mu$ m.

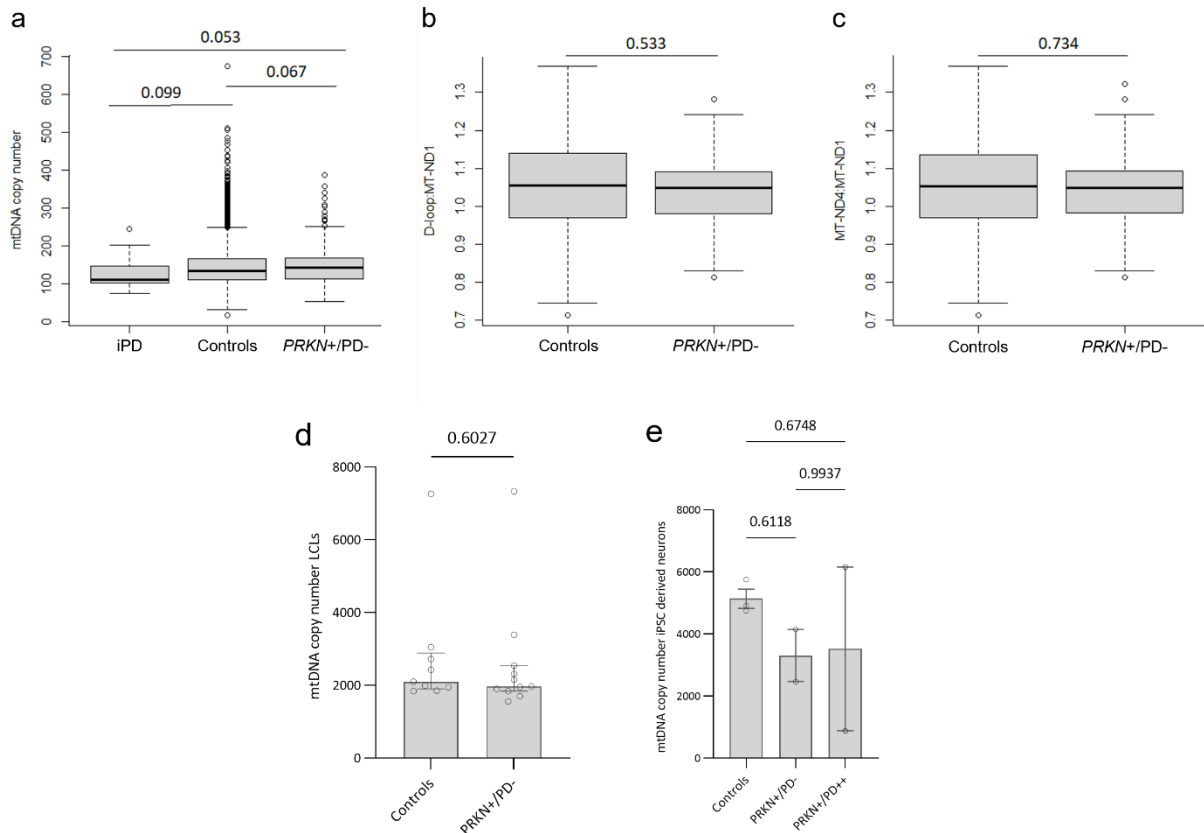

**Supplementary Figure 2. mtDNA analyses in individuals carrying a heterozygous variant in *PRKN*.** Real-time PCR quantification of the nuclear-encoded gene beta-2-microglobulin (*B2M*) and mtDNA sequences in the tRNA-Leu gene, the D-loop, the minor arc gene *MT-ND1* and the major arc gene *MT-ND4*. **(a)** tRNA-Leu:B2M ratio, indicating the amount of mtDNA copies in peripheral blood of individuals carrying a

heterozygous variant in *PRKN* (*PRKN*+/*PD*-) (n = 341), controls (n = 8,445), and iPD patients (n = 29). **(b)** D-loop:MT-ND1 ratio, indicating the amount of transcription-associated 7S DNA per mtDNA molecule in individuals carrying a heterozygous variant in *PRKN* (*PRKN*+/*PD*-) (n = 79), controls (n = 77). **(c)** MT-ND4:MT-ND1 ratio, indicating major arc deletions in individuals carrying a heterozygous variant in *PRKN* (*PRKN*+/*PD*-) (n = 79) and controls (n = 77). The horizontal line within the box indicates the median. **(d)** tRNA-Leu:B2M ratio, indicating the amount of mtDNA copies in LCLs of individuals carrying a heterozygous variant in *PRKN* (*PRKN*+/*PD*-) (n = 11) and controls (n = 9). **(e)** tRNA-Leu:B2M ratio, indicating the amount of mtDNA copies in iPSC-derived neurons of individuals carrying a heterozygous variant in *PRKN* (*PRKN*+/*PD*-) (n = 2), controls (n = 3) and a *PRKN* PD patient (*PRKN*+/*PD*++) (n = 2). Error bars represent the mean  $\pm$  SEM. p values reported in the figures are the results of the Mann-Whitney test performed for each pair of groups within each mtDNA dataset and one-way ANOVA and Tukey's *post hoc* test to correct for multiple comparisons.

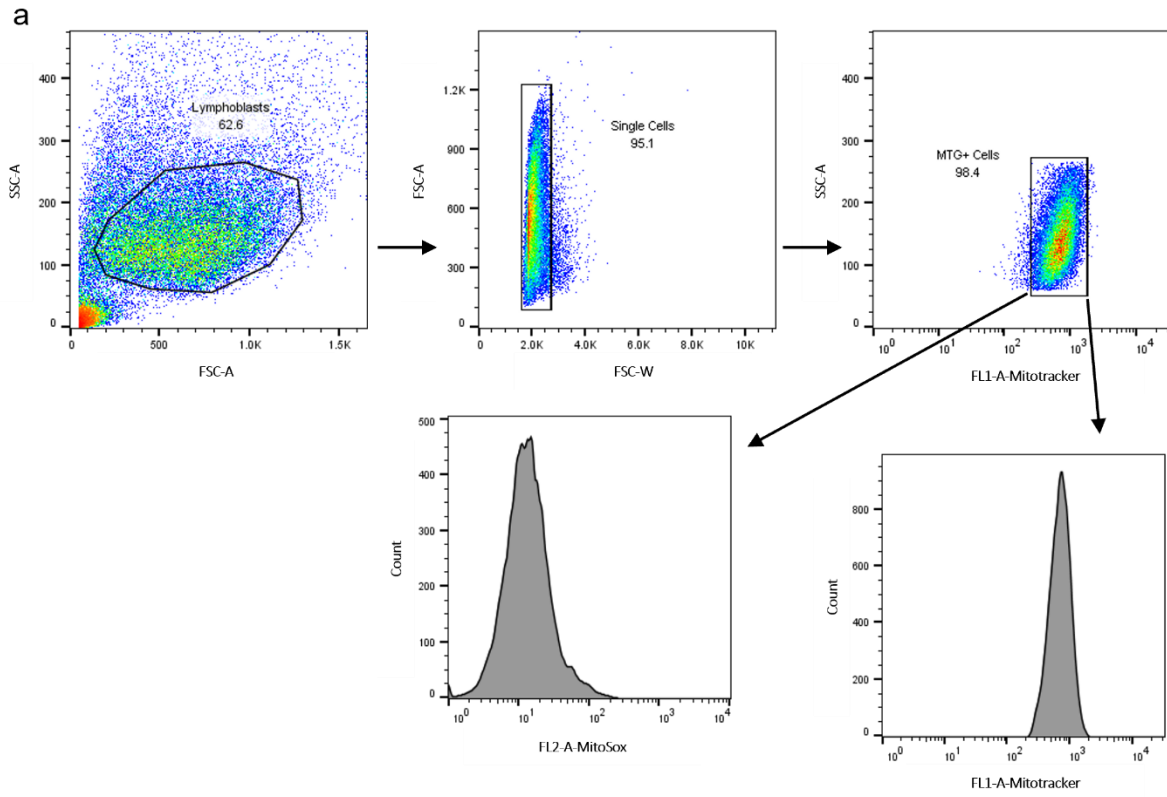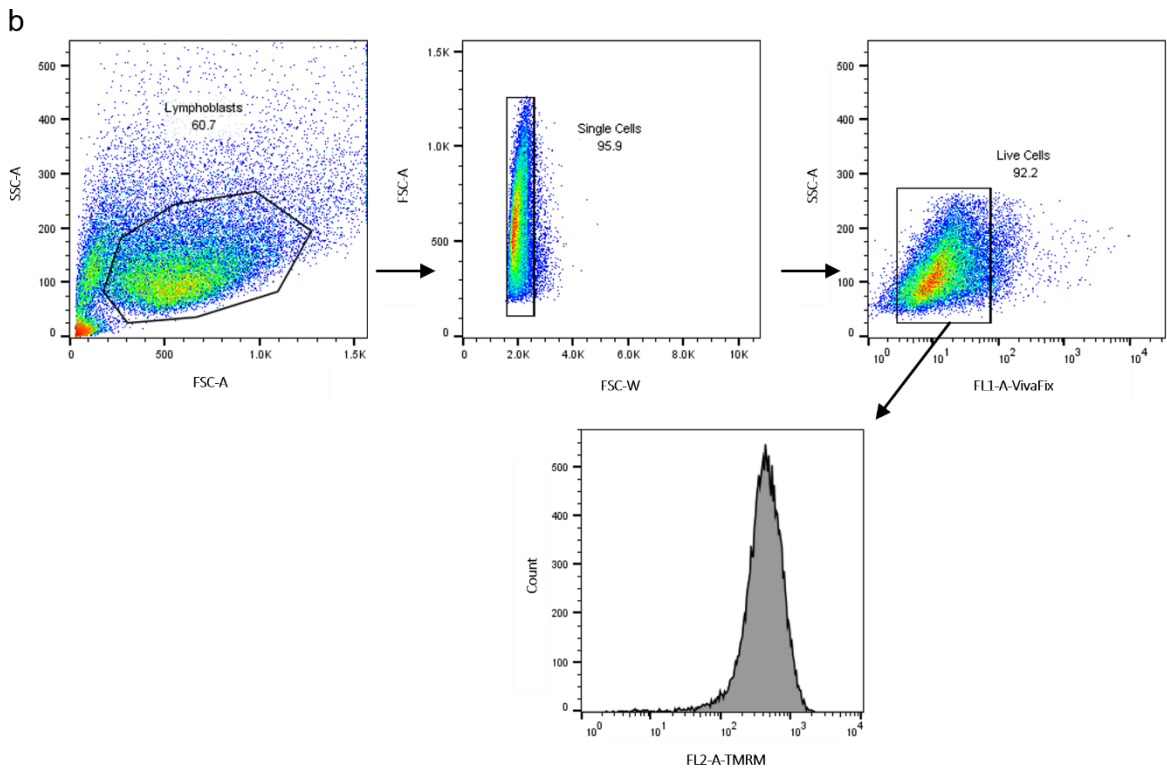

**Supplementary Figure 3. Gating strategy for flow cytometry analysis in LCLs.** Representative gating strategy plots of LCLs co-stained with (a) MitoTracker™ Green (MTG) and MitoSOX™ red to assess mROS

production (mitochondrial superoxide) and **(b)** co-stained with VivaFix™ and TMRM™ to determine mitochondrial membrane potential. The gating order is represented with black arrows and includes subsequent separation of LCLs (gated by forward (FSC-A) and sideward (SSC-A) scatter) and single cells (determined using FSC-A vs FSC-W). Next, MTG<sup>+</sup> cells or live cells (VivaFix) were gated, and the mean value of MitoSOX red, MTG and TMRM was determined.

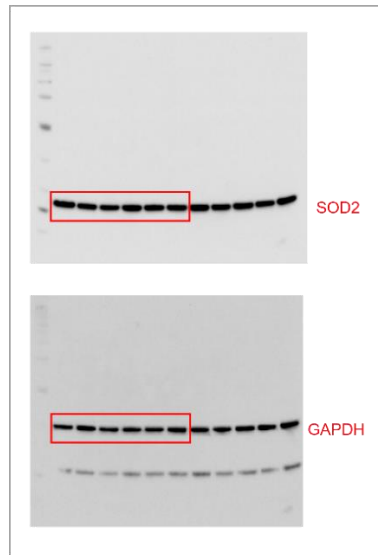

**Uncropped western blots shown in Figure 4c**

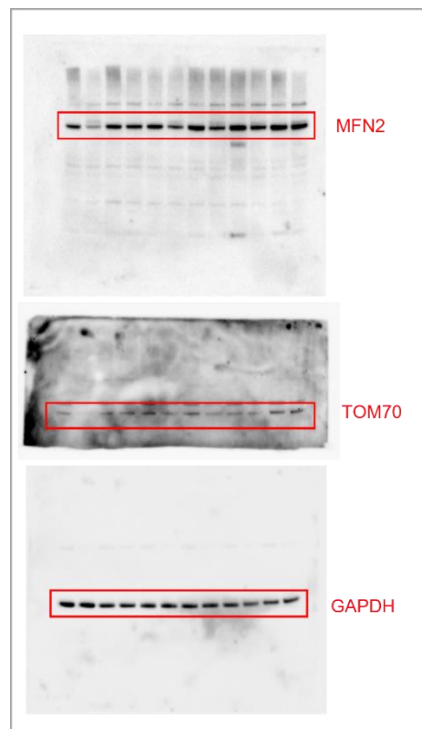

**Uncropped western blots shown in Figure 6a**

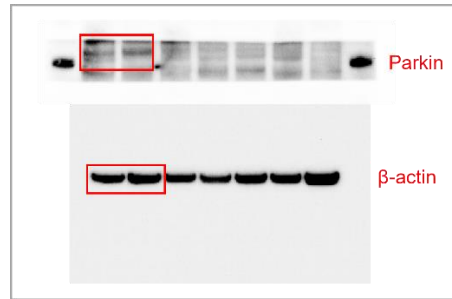

Uncropped western blots shown in Supplementary Figure 1a

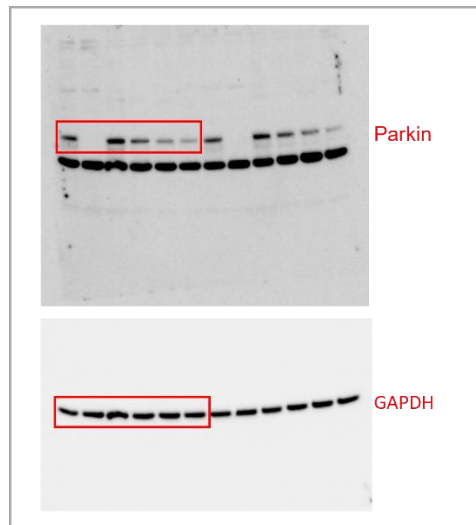

Uncropped western blots shown in Supplementary Figure 1b

## References

- 1 Heinzl, S. *et al.* Update of the MDS research criteria for prodromal Parkinson's disease. *Mov Disord* **34**, 1464-1470 (2019). <https://doi.org:10.1002/mds.27802>
- 2 Fereshtehnejad, S. M. *et al.* Evolution of prodromal Parkinson's disease and dementia with Lewy bodies: a prospective study. *Brain* **142**, 2051-2067 (2019). <https://doi.org:10.1093/brain/awz111>
- 3 Zanon, A. *et al.* SLP-2 interacts with Parkin in mitochondria and prevents mitochondrial dysfunction in Parkin-deficient human iPSC-derived neurons and *Drosophila*. *Hum Mol Genet* **26**, 2412-2425 (2017). <https://doi.org:10.1093/hmg/ddx132>
- 4 Zanon, A. *et al.* Generation of an induced pluripotent stem cell line (EURACi005-A) from a Parkinson's disease patient carrying a homozygous exon 3 deletion in the *PRKN* gene. *Stem Cell Res* **41**, 101624 (2019). <https://doi.org:10.1016/j.scr.2019.101624>
